# Supplementary material for: Coriocella and the Worms: First Record of Scale-Worm Asterophilia cf. culcitae Ectosymbiotic on a Mollusc
Source: MDPI journal article supplement (doi:10.3390/d16010065), 2024-01-18

# ***Coriocella* and the Worms: First Record of Scale-Worm *Asterophilia* cf. *culcitae* Ectosymbiotic on a Mollusc**

Giulia Fassio<sup>1,2</sup>

<sup>1</sup>Department of Biology and Biotechnologies “Charles Darwin”, Sapienza University of Rome, Rome, Italy. [giulia.fassio@uniroma1.it](mailto:giulia.fassio@uniroma1.it)

<sup>2</sup> Institut de Systématique, Évolution, Biodiversité (ISYEB), UMR 7205 (CNRS, EPHE, MNHN, UPMC), Muséum national d'Histoire naturelle, Sorbonne Universités, Paris, France

## **Supplementary Materials**

**Table S1.** Sequences used for molecular analyses (including voucher codes, sampling localities, and GenBank accession numbers; \* indicates sequences newly produced for this paper).

| <b>Voucher</b>   | <b>Class</b> | <b>Family</b> | <b>Species</b>                          | <b>Locality</b>                                                                                                            | <b>COI</b>    |
|------------------|--------------|---------------|-----------------------------------------|----------------------------------------------------------------------------------------------------------------------------|---------------|
| MNHN-IA-2021-675 | Polychaeta   | Polynoidae    | <i>Asterophilia</i> cf. <i>culcitae</i> | New Caledonia, Nouméa, NE Sèche Croissant; Quinzaine des Nudibranches 2022/QNCL_OA; 22°18'57.9"S 166°21'48.3"E, <2 m depth | OR933635<br>* |
| MNHN-IA-2021-676 | Polychaeta   | Polynoidae    | <i>Asterophilia</i> cf. <i>culcitae</i> | New Caledonia, Nouméa, NE Sèche Croissant; Quinzaine des Nudibranches 2022/QNCL_OA; 22°18'57.9"S 166°21'48.3"E; <2 m depth | OR933636<br>* |
| 1                | Polychaeta   | Polynoidae    | <i>Asterophilia culcitae</i>            | Japan, Yakatakatabaru, Okinawa Island                                                                                      | LC538222      |
| 2                | Polychaeta   | Polynoidae    | <i>Asterophilia culcitae</i>            | Japan, Yakatakatabaru, Okinawa Island                                                                                      | LC538223      |
| 3                | Polychaeta   | Polynoidae    | <i>Asterophilia culcitae</i>            | Japan, Sakimotobu, Okinawa Island                                                                                          | LC538224      |
| 4                | Polychaeta   | Polynoidae    | <i>Asterophilia culcitae</i>            | Japan, Kushimoto, Wakayama                                                                                                 | LC538225      |
| 5                | Polychaeta   | Polynoidae    | <i>Asterophilia culcitae</i>            | Japan, Kashiwa Island, Kochi                                                                                               | LC538226      |
| 6                | Polychaeta   | Polynoidae    | <i>Asterophilia culcitae</i>            | Japan, Kashiwa Island, Kochi                                                                                               | LC538227      |
| 7                | Polychaeta   | Polynoidae    | <i>Asterophilia culcitae</i>            | Japan, Kushimoto, Wakayama                                                                                                 | LC538228      |
| 8                | Polychaeta   | Polynoidae    | <i>Asterophilia culcitae</i>            | Japan, Kushimoto, Wakayama                                                                                                 | LC538229      |
| 9                | Polychaeta   | Polynoidae    | <i>Asterophilia culcitae</i>            | Japan, Zamami Island, Okinawa                                                                                              | LC538230      |
| 10               | Polychaeta   | Polynoidae    | <i>Asterophilia culcitae</i>            | Japan, Kushimoto, Wakayama                                                                                                 | LC538231      |
| 11               | Polychaeta   | Polynoidae    | <i>Asterophilia culcitae</i>            | Japan, Kushimoto, Wakayama                                                                                                 | LC538232      |

|                    |            |             |                                      |                                                                                                                            |            |
|--------------------|------------|-------------|--------------------------------------|----------------------------------------------------------------------------------------------------------------------------|------------|
| SMNH 118964        | Polychaeta | Polynoidae  | <i>Gastrolepidia clavigera</i>       |                                                                                                                            | JN852927   |
| USNM IZ 1524013    | Polychaeta | Polynoidae  | <i>Arctonoe vittata</i>              | USA, Kalekta Bay, South of Cape Kalekta                                                                                    | MZ580810   |
| USNM IZ 1524047    | Polychaeta | Polynoidae  | <i>Arctonoe vittata</i>              | USA, Unalaska Bay, North of Hog Island                                                                                     | MZ580824   |
| ESCI426 68         | Polychaeta | Polynoidae  | <i>Arctonoe pulchra</i>              | USA, Washington, Anacortes, Shannon Point Beach                                                                            | MN447983   |
| MBI SCCWRP 45      | Polychaeta | Polynoidae  | <i>Arctonoe pulchra</i>              | USA, 32.678 N 117.33 W                                                                                                     | HQ941716   |
| SIO BIC A6558      | Polychaeta | Polynoidae  | <i>Branchipolynoe halliseyae</i>     | Costa Rica, Pacific Ocean, Methane Seep, 999 m depth                                                                       | MH370022   |
| MNHN-IM-2019-26118 | Gastropoda | Velutinidae | <i>Coriocella</i> cf. <i>tongana</i> | New Caledonia, Nouméa, NE Sèche Croissant; Quinzaine des Nudibranches 2022/QNCL_OA; 22°18'57.9"S 166°21'48.3"E, <2 m depth | OR933634 * |
| MNHN-IM-2019-3211  | Gastropoda | Velutinidae | <i>Coriocella</i> sp.                | New Caledonia, KOUMAC 2.3/KB608, 20°34.9' S, 164°07.6' E, 15 m depth                                                       | ON524246   |
| MNHN-IM-2013-84230 | Gastropoda | Velutinidae | <i>Coriocella</i> sp.                | New Caledonia, Kendec Is., KOUMAC 2.1/KM302, 20°40.1' S, 164°15.4' E, 0 m depth                                            | ON524247   |
| MNHN-IM-2009-16119 | Gastropoda | Velutinidae | <i>Coriocella</i> cf. <i>jayi</i>    | Madagascar, Lavanono sector, ATIMO VATAE/BV06, 25°26.9' S, 44°55.9' E, 14 m depth                                          | MK047762   |
| MNHN-IM-2009-16120 | Gastropoda | Velutinidae | <i>Coriocella</i> cf. <i>jayi</i>    | Madagascar, Lavanono sector, ATIMO VATAE/BV06, 25°26.9' S, 44°55.9' E, 14 m depth                                          | MK047763   |
| MNHN-IM-2009-16128 | Gastropoda | Velutinidae | <i>Coriocella nigra</i>              | Madagascar, Lavanono sector, ATIMO VATAE/BB03, 25°26.4' S, 44°56.1' E, 14 m depth                                          | MK047761   |
| BJLinnSoc-2        | Gastropoda | Velutinidae | <i>Coriocella</i> cf. <i>semperi</i> | Australia, Lizard Is.                                                                                                      | AY161614   |
| MNHN-IM-2013-75535 | Gastropoda | Velutinidae | <i>Coriocella</i> cf. <i>semperi</i> | Austral Islands, Tubuai, external barrier, Tuhaa Pae 2013/AT04, 23°25.1' S, 149°27' W, 14 m depth                          | ON524248   |
| MNHN-IM-2019-8812  | Gastropoda | Velutinidae | <i>Djiboutia</i> sp.                 | New Caledonia, KOUMAC 2.3/KB639, 20°45.1' S, 164°13.9' E, 22 m depth                                                       | ON524245   |

**Table S2.** Pairwise COI genetic distances (%) between worm specimens, calculated with MEGA11 (K2P, pairwise deletion).

|                                                        | MNHN_IA_2021_675 | MNHN_IA_2021_676 | LC538232 | LC538231 | LC538230 | LC538229 | LC538228 | LC538226 | LC538225 | LC538223 | LC538227 | LC538224 | LC538222 | JN852927 | MZ580810 | MZ580824 | MN447983 | HQ941716 | MH370022 |
|--------------------------------------------------------|------------------|------------------|----------|----------|----------|----------|----------|----------|----------|----------|----------|----------|----------|----------|----------|----------|----------|----------|----------|
| MNHN_IA_2021_675_Asterophilia_cf_culcitae_NewCaledonia | 0                |                  |          |          |          |          |          |          |          |          |          |          |          |          |          |          |          |          |          |
| MNHN_IA_2021_676_Asterophilia_cf_culcitae_NewCaledonia | 0.9              | 0                |          |          |          |          |          |          |          |          |          |          |          |          |          |          |          |          |          |
| LC538232_Asterophilia_culcitae_haplo_11_Japan          | 1.9              | 2.3              | 0        |          |          |          |          |          |          |          |          |          |          |          |          |          |          |          |          |
| LC538231_Asterophilia_culcitae_haplo_10_Japan          | 1.9              | 2.3              | 0        | 0        |          |          |          |          |          |          |          |          |          |          |          |          |          |          |          |
| LC538230_Asterophilia_culcitae_haplo_09_Japan          | 1.9              | 2.3              | 0        | 0        | 0        |          |          |          |          |          |          |          |          |          |          |          |          |          |          |
| LC538229_Asterophilia_culcitae_haplo_08_Japan          | 1.9              | 2.3              | 0        | 0        | 0        | 0        |          |          |          |          |          |          |          |          |          |          |          |          |          |
| LC538228_Asterophilia_culcitae_haplo_07_Japan          | 1.9              | 2.3              | 0        | 0        | 0        | 0        | 0        |          |          |          |          |          |          |          |          |          |          |          |          |
| LC538226_Asterophilia_culcitae_haplo_05_Japan          | 1.9              | 2.3              | 0        | 0        | 0        | 0        | 0        | 0        |          |          |          |          |          |          |          |          |          |          |          |
| LC538225_Asterophilia_culcitae_haplo_04_Japan          | 1.9              | 2.3              | 0        | 0        | 0        | 0        | 0        | 0        | 0        |          |          |          |          |          |          |          |          |          |          |
| LC538223_Asterophilia_culcitae_haplo_02_Japan          | 1.9              | 2.3              | 0        | 0        | 0        | 0        | 0        | 0        | 0        | 0        |          |          |          |          |          |          |          |          |          |
| LC538227_Asterophilia_culcitae_haplo_06_Japan          | 2.1              | 2.5              | 0.2      | 0.2      | 0.2      | 0.2      | 0.2      | 0.2      | 0.2      | 0.2      | 0        |          |          |          |          |          |          |          |          |
| LC538224_Asterophilia_culcitae_haplo_03_Japan          | 2.1              | 2.5              | 0.2      | 0.2      | 0.2      | 0.2      | 0.2      | 0.2      | 0.2      | 0.2      | 0.3      | 0        |          |          |          |          |          |          |          |
| LC538222_Asterophilia_culcitae_haplo_01_Japan          | 2.3              | 2.6              | 0.3      | 0.3      | 0.3      | 0.3      | 0.3      | 0.3      | 0.3      | 0.3      | 0.5      | 0.5      | 0        |          |          |          |          |          |          |
| JN852927_Gastrolepidia_clavigera_SMNH118964            | 18.9             | 18.8             | 19.8     | 19.8     | 19.8     | 19.8     | 19.8     | 19.8     | 19.8     | 19.8     | 20       | 20       | 20.3     | 0        |          |          |          |          |          |
| MZ580810_Arctonoe_vittata_USNM_IZ_1524013              | 24.6             | 24.8             | 23.1     | 23.1     | 23.1     | 23.1     | 23.1     | 23.1     | 23.1     | 23.1     | 23.3     | 23.3     | 22.6     | 25.7     | 0        |          |          |          |          |
| MZ580824_Arctonoe_vittata_USNM_IZ_1524047              | 24.6             | 24.8             | 22.8     | 22.8     | 22.8     | 22.8     | 22.8     | 22.8     | 22.8     | 22.8     | 23.1     | 23.1     | 22.3     | 25.4     | 0.5      | 0        |          |          |          |
| MN447983_Arctonoe_pulchra_ESCI426_68                   | 24.8             | 24.1             | 23.7     | 23.7     | 23.7     | 23.7     | 23.7     | 23.7     | 23.7     | 23.7     | 23.9     | 23.9     | 23.2     | 26       | 7.6      | 7.4      | 0        |          |          |
| HQ941716_Arctonoe_pulchra_MBI_SCCWRP_00045             | 25.2             | 25.1             | 24.4     | 24.4     | 24.4     | 24.4     | 24.4     | 24.4     | 24.4     | 24.4     | 24.6     | 24.6     | 23.9     | 25.5     | 7.9      | 7.7      | 1.7      | 0        |          |
| MH370022_Branchipolynoe_halliseyae_SIO_BIC_A6558       | 30.2             | 30.1             | 29.4     | 29.4     | 29.4     | 29.4     | 29.4     | 29.4     | 29.4     | 29.4     | 29.7     | 29.7     | 29.4     | 30.1     | 31.2     | 31.7     | 29.5     | 29.5     | 0        |

**Table S3.** Pairwise COI genetic distances (%) between snail specimens, calculated with MEGA11 (K2P, pairwise deletion).

|                                                   | MNHN_IM_2019_26118 | ON524246 | ON524247 | MK047762 | MK047763 | MK047761 | AY161614 | ON524248 | ON524245 |
|---------------------------------------------------|--------------------|----------|----------|----------|----------|----------|----------|----------|----------|
| MNHN_IM_2019_26118_Coriocella_sp_NewCaledonia     | 0                  |          |          |          |          |          |          |          |          |
| ON524246_Coriocella_sp_MNHN_IM_2019_3211          | 13.7               | 0        |          |          |          |          |          |          |          |
| ON524247_Coriocella_sp_MNHN_IM_2013_84230         | 13.7               | 0.7      | 0        |          |          |          |          |          |          |
| MK047762_Coriocella_cf_javi_MNHN_IM_2009_16119    | 17.2               | 18.3     | 18.8     | 0        |          |          |          |          |          |
| MK047763_Coriocella_cf_javi_MNHN_IM_2009_16120    | 14.9               | 16.6     | 17.1     | 2.5      | 0        |          |          |          |          |
| MK047761_Coriocella_nigra_MNHN_IM_2009_16128      | 17.1               | 14.1     | 14.1     | 16.3     | 14.2     | 0        |          |          |          |
| AY161614_Coriocella_cf_semperi_BJLinnSoc_2        | 16.7               | 15.1     | 15.5     | 17.2     | 15.1     | 6.4      | 0        |          |          |
| ON524248_Coriocella_cf_semperi_MNHN_IM_2013_75535 | 16.2               | 14.9     | 15.3     | 17.2     | 15.1     | 6.2      | 0.8      | 0        |          |
| ON524245_Djiboutia_sp_MNHN_IM_2019_8812           | 19.7               | 19.4     | 20.0     | 22.6     | 20.3     | 20.9     | 20.1     | 20.0     | 0        |

**Figure S1.** Bayesian Inference tree of the COI worm dataset, at nodes posterior probability values (considered supported when >0.95)

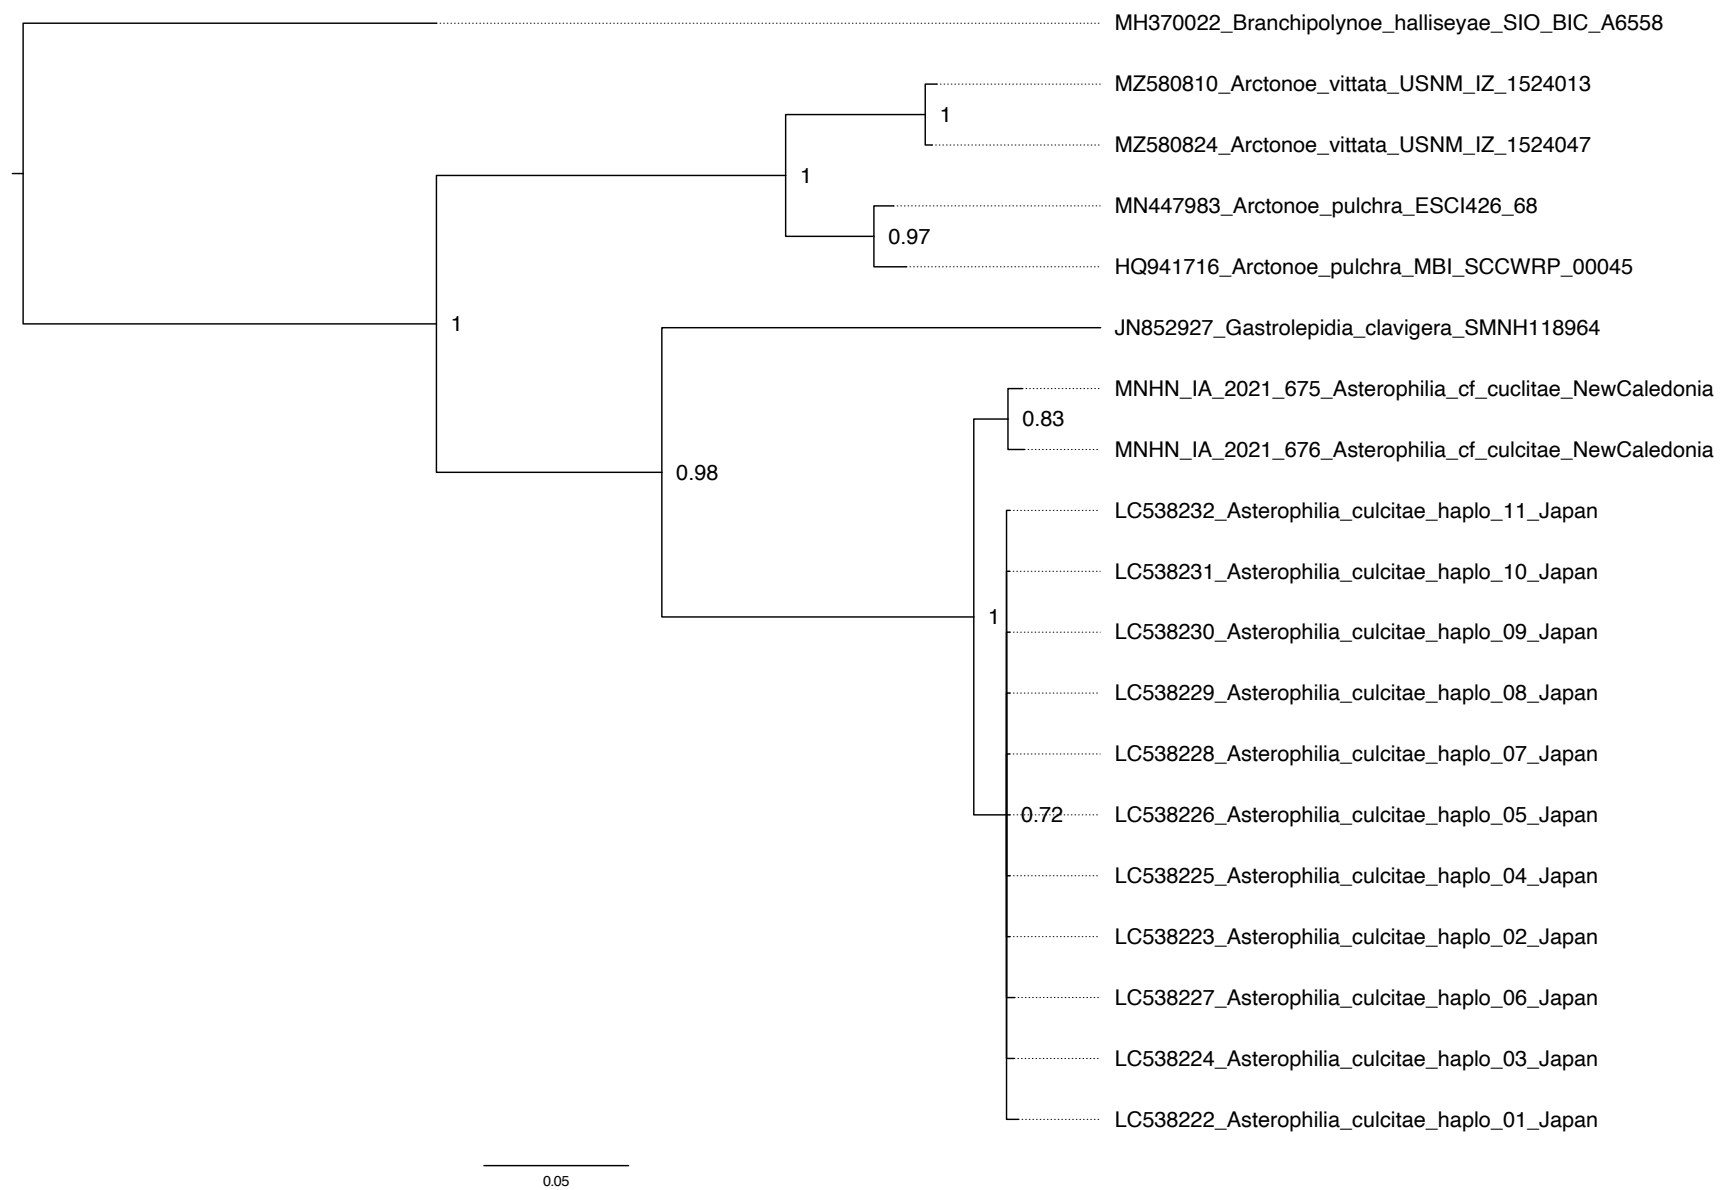

**Figure S2.** Bayesian Inference tree of the COI snail dataset, at nodes posterior probability values (considered supported when >0.95)

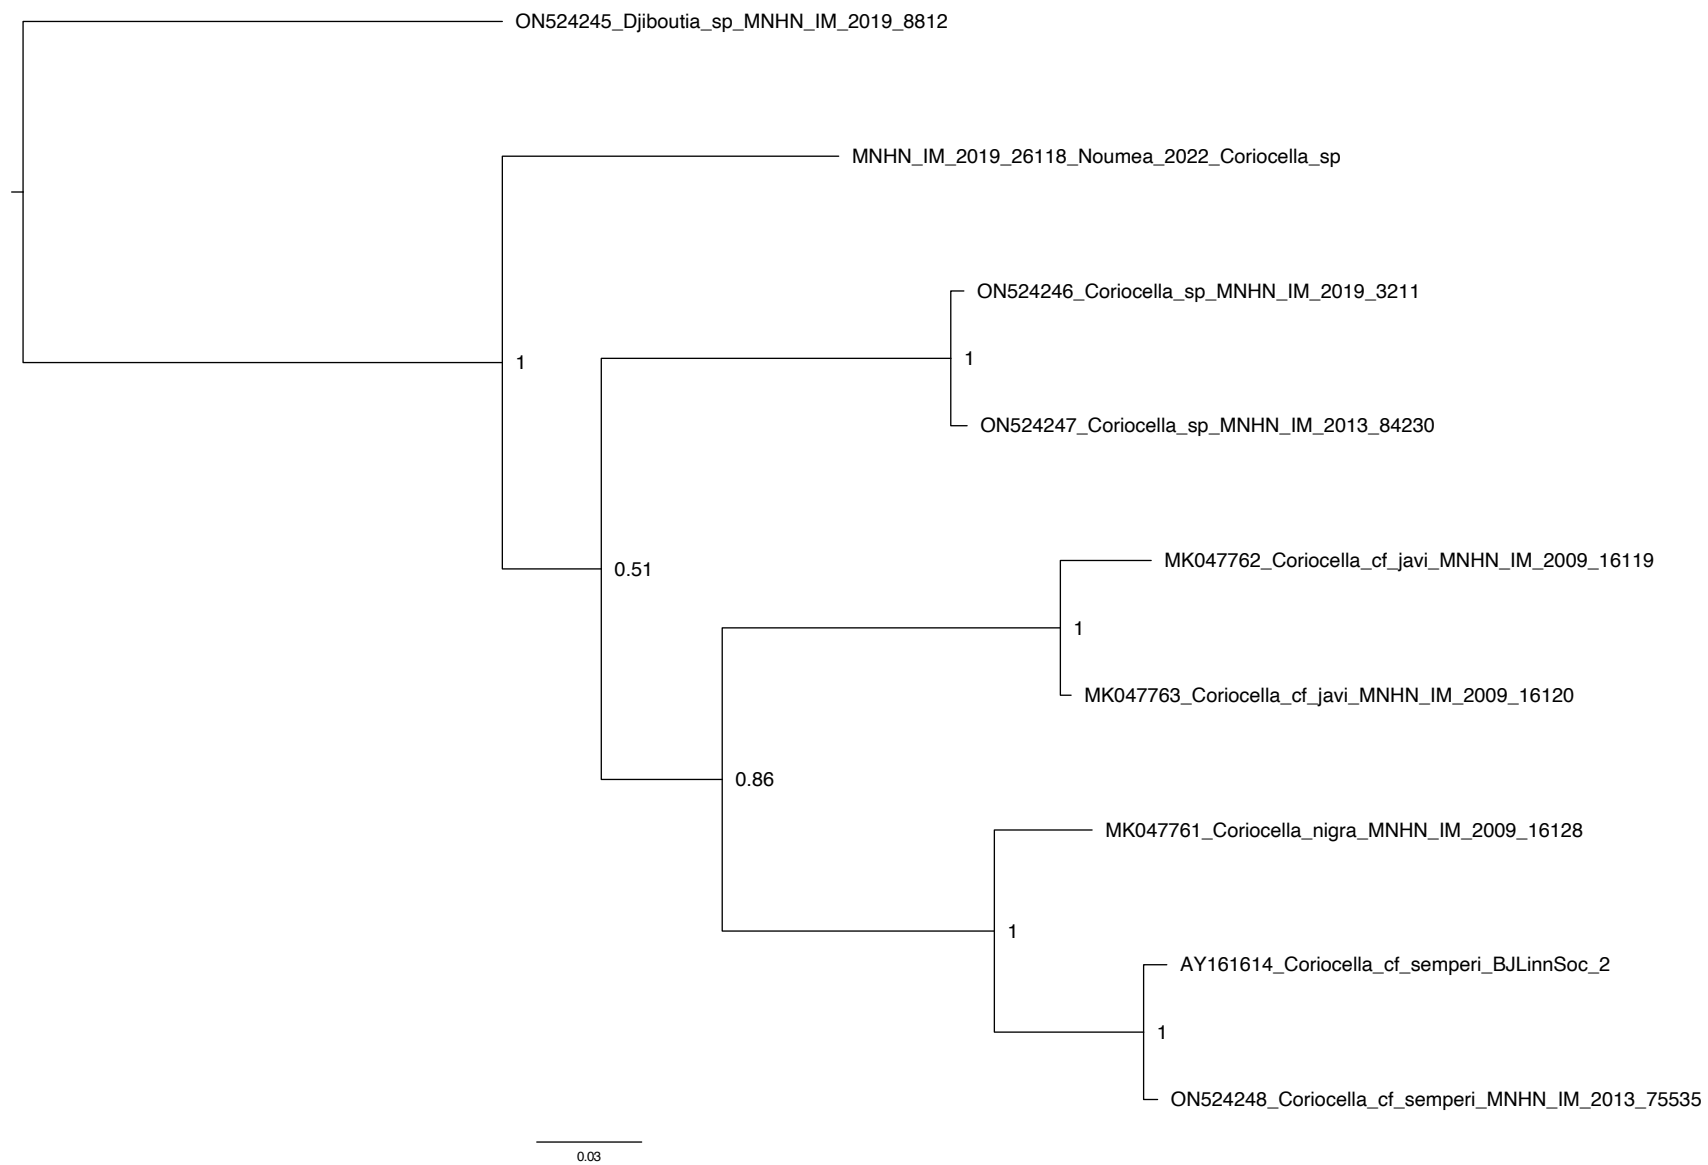

Supplement: s1 [file s1]
